# Supplementary material
Source: HighWire-hosted journal article supplement (https://dmd.aspetjournals.org/highwire/filestream/74836/field_highwire_adjunct_files/0/DMD89276_Data_Supplement.pdf)
Supplement: DMD89276_Data_Supplement.pdf [file DMD89276_Data_Supplement.pdf]

**Title: Evaluation of Quantitative Relationship Between Target Expression and ADC  
Exposure Inside Cancer Cells**

**Authors:** Sharad Sharma, Zhe Li, David Bussing, and Dhaval K. Shah\*

Department of Pharmaceutical Sciences, School of Pharmacy and Pharmaceutical Sciences,  
The State University of New York at Buffalo, 455 Kapoor Hall, Buffalo, New York, 14214-8033,  
USA

**Journal Title:** Drug Metabolism and Disposition

## Supplementary Figure 1

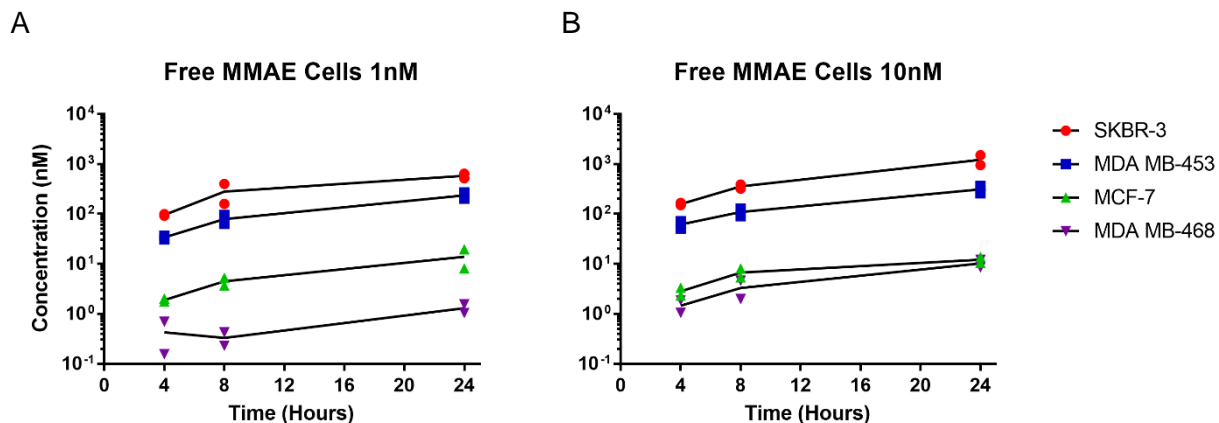

**Supplementary Figure 1.** Comparison of intracellular free MMAE PK profiles between different breast cancer cell lines, after **(A)** 1 nM or **(B)** 10 nM T-vc-MMAE incubation.

## Supplementary Figure 2

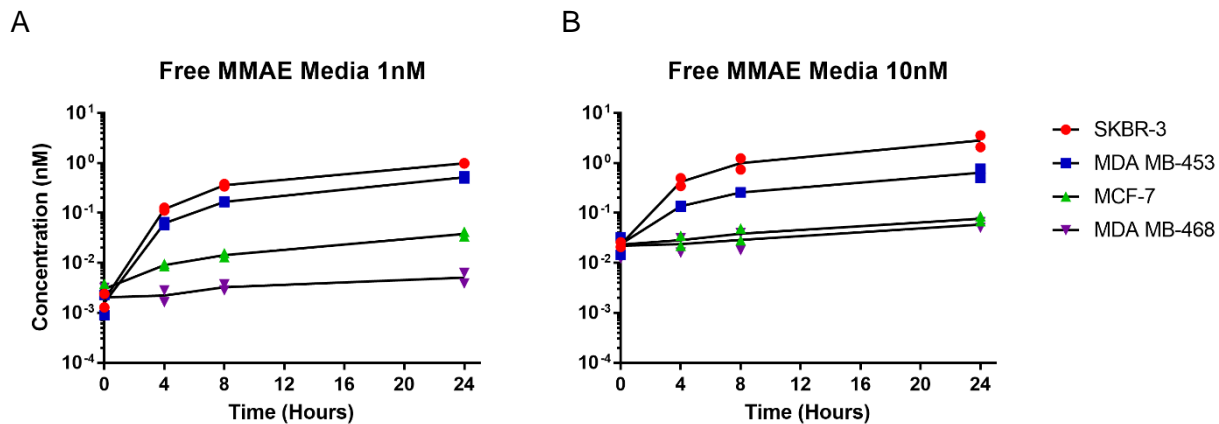

**Supplementary Figure 2.** Comparison of extracellular free MMAE PK profiles between different breast cancer cell lines, after **(A)** 1 nM or **(B)** 10 nM T-vc-MMAE incubation.

## Supplementary Figure 3

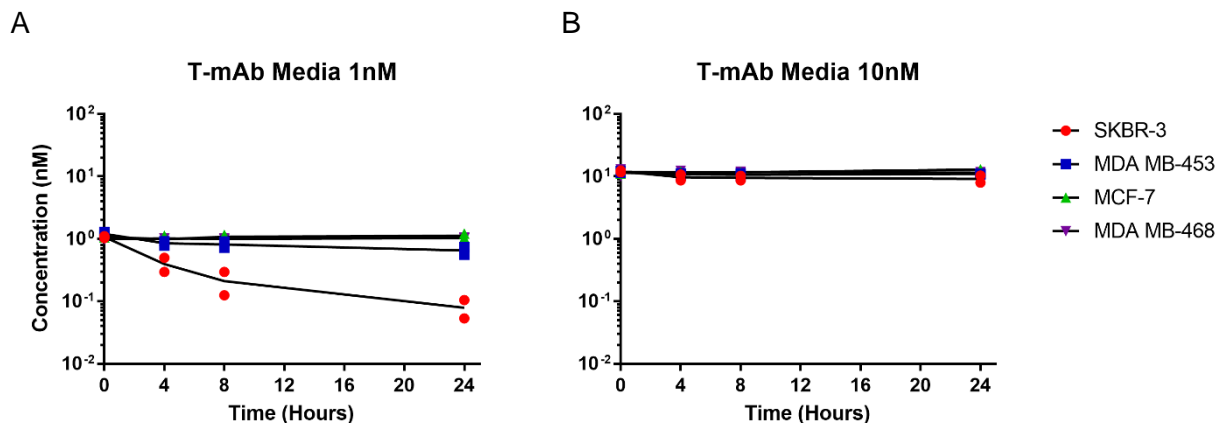

**Supplementary Figure 3.** Comparison of extracellular total trastuzumab PK profiles between different breast cancer cell lines, after **(A)** 1 nM or **(B)** 10 nM T-vc-MMAE incubation.

## Supplementary Figure 4

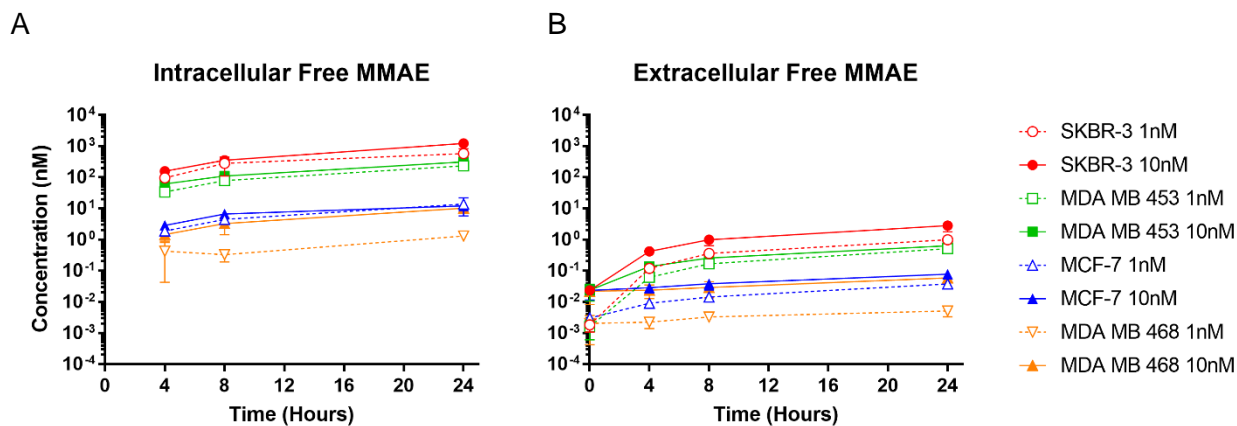

**Supplementary Figure 4.** **(A)** Intracellular and **(B)** Extracellular free MMAE concentration (mean  $\pm$ SD) vs. time plots for different breast cancer cell lines, after treatment with 1 nM (open symbol with dashed line) or 10 nM (solid symbol with solid line) T-vc-MMAE.
